# Supplementary material for: Association of Neutrophil to Lymphocyte Ratio With Pulmonary Function in a 30-Year Longitudinal Study of US Veterans
Source: PubMed Central journal article supplement (PMC7358911; doi:10.1001/jamanetworkopen.2020.10350), 2020-07-13
Supplement: jamanetwopen-3-e2010350-s001.pdf [file jamanetwopen-3-e2010350-s001.pdf]

## Supplementary Online Content

Gao X, Coull B, Lin X, et al. Association of neutrophil to lymphocyte ratio with pulmonary function in a 30-year longitudinal study of US veterans. *JAMA Netw Open*. 2020;3(7):2010350. doi:10.1001/jamanetworkopen.2020.10350

**eAppendix.** Data Collection and DNA Methylation Data

**eTable 1.** Characteristics of Participants From the Normative Aging Study for All Visits and the Subgroup With DNA Methylation Data

**eTable 2.** Associations of Neutrophil to Lymphocyte Ratio With Lung Function and Odds of COPD Stratified by Smoking Status

**eTable 3.** Associations of Neutrophil to Lymphocyte Ratio at First Visit and Change Rate Between First and Up to Fifth Visit, Including Change Rate of Lung Function in Subgroup With Available Data From 2 Visits

**eTable 4.** Association of Neutrophil to Lymphocyte Ratio With cg05575921

**eTable 5.** Associations of Neutrophil to Lymphocyte Ratio and cg05575921 With Lung Function and Odds of COPD in the Subgroup With DNA Methylation Data

**eTable 6.** Joint Associations of Neutrophil to Lymphocyte Ratio and cg05575921 With Lung Function and Odds of COPD in the Subgroup With DNA Methylation Data

**eTable 7.** Association of Neutrophil to Lymphocyte Ratio With COPD Incidence in the Subgroup With DNA Methylation Data

**eTable 8.** Estimates of Natural Direct and Natural Indirect Associations of NLR or cg05575921 on Lung Function and Proportion Mediated by cg05575921 or NLR

**eTable 9.** Estimates of Natural Direct and Natural Indirect Associations of NLR or cg05575921 on Lung Function and Proportion Mediated by cg05575921 or NLR Stratified by Smoking Status

**eFigure.** Associations of the Change Rate of Neutrophil to Lymphocyte Ratio Between the First and up to the Fifth Visit With Lung Function Change Rate

This supplementary material has been provided by the authors to give readers additional information about their work.

## **eAppendix.** Data Collection and DNA Methylation Data

### *Data collection*

As described [1], participants were asked to provide detailed information about their lifestyles, dietary habits, activity levels, and demographic factors at each of up to 13 visits between 1984 and 2018. BMIs ( $\text{kg}/\text{m}^2$ ) were calculated from heights and weights. Major diseases including other chronic lung conditions (asthma, chronic bronchitis, and emphysema) were assessed based on medical histories and prior diagnoses. Spirometry was assessed in the standing position with a noseclip using a 10-liter water-filled survey-recording spirometer and an Eagle II minicomputer (Warren E. Collins, Braintree, Massachusetts). Standard methods were used to obtain FEV<sub>1</sub> (liters), FVC (liters), percent of vital capacity (FEV<sub>1</sub>/FVC), and maximal mid-expiratory flow rate (MMEF, liters/minute, calculated as the average flow rate between 25% and 75% of FVC). All values were corrected to body temperature and pressure-saturated with water vapor. Spirometry may lead to over-diagnosis of COPD in the elderly [2]; thus, COPD was defined as meeting the Global Initiative for Chronic Obstructive Lung Diseases (GOLD) stage II (or higher) criteria (FEV<sub>1</sub>/FVC <70% and FEV<sub>1</sub> <80% predicted) [3]. Smoking history, including status and pack-years, were assessed at the time of spirometry tests using the American Thoracic Society (ATS) questionnaire. NLR was calculated at each visit by dividing total absolute neutrophil counts by total absolute lymphocyte counts measured by automatic blood cell counters as a continuous variable. All participants were required to be fasting at the time blood was drawn. To explore potential cutoff points, two NLR values were defined as a low (reference) and high measurement: 1) a value of 3.0, a potential optimal cut-off for the upper limit of normal NLR [4]; and 2) a value of 2.27, the mean NLR of the selected participants.

### *DNA methylation data*

As described [5], we used the QIAamp DNA Blood Kit (Qiagen, CA, USA) to extract DNA from buffy coat and performed bisulfite conversion with the EZ-96 DNA Methylation Kit (Zymo Research, CA, USA). We randomized chips across plates and randomized samples based on a two-stage age-stratified algorithm to minimize batch effects. We then measured DNA methylation profiles using the Illumina 450K BeadChip. After quality control, remaining samples were preprocessed using the Illumina-type background correction, dye-bias adjustment, and BMIQ normalization to generate methylation status. Methylation status of a specific CpG site was quantified as a  $\beta$  value ranging from 0 (no methylation) to 1 (full methylation). The methylation status of cg05575921 was retrieved from the whole epigenome data for this study.

### **References**

1. Gao X, Coull B, Lin X, Vokonas P, Schwartz J, Baccarelli AA: **Nonsteroidal anti-inflammatory drugs modify the effect of short-term air pollution on lung function.** *Am J Respir Crit Care Med* 2019 (In press).
2. Qaseem A, Wilt TJ, Weinberger SE, Hanania NA, Criner G, van der Molen T, Marciniuk DD, Denberg T, Schunemann H, Wedzicha W, et al: **Diagnosis and management of stable chronic obstructive pulmonary disease: a clinical practice guideline update from the American College of Physicians, American College of Chest Physicians, American Thoracic Society, and European Respiratory Society.** *Ann Intern Med* 2011, **155**:179-191.
3. Vogelmeier CF, Criner GJ, Martinez FJ, Anzueto A, Barnes PJ, Bourbeau J, Celli BR, Chen R, Decramer M, Fabbri LM, et al: **Global Strategy for the Diagnosis,**

**Management, and Prevention of Chronic Obstructive Lung Disease 2017 Report.**

**GOLD Executive Summary.** *Am J Respir Crit Care Med* 2017, **195**:557-582.

4. Vano YA, Oudard S, By MA, Tetu P, Thibault C, Aboudagga H, Scotte F, Elaidi R:  
**Optimal cut-off for neutrophil-to-lymphocyte ratio: Fact or Fantasy? A prospective cohort study in metastatic cancer patients.** *PLoS One* 2018, **13**:e0195042.
5. Gao X, Colicino E, Shen J, Kioumourtzoglou MA, Just AC, Nwanaji-Enwerem JC, Coull B, Lin X, Vokonas P, Zheng Y, et al: **Impacts of air pollution, temperature, and relative humidity on leukocyte distribution: An epigenetic perspective.** *Environ Int* 2019, **126**:395-405.

**eTable 1.** Characteristics of Participants From the Normative Aging Study for All Visits and the Subgroup With DNA Methylation Data

| Characteristics                                     | All visits (N = 7466) | Subset (N = 1228) |
|-----------------------------------------------------|-----------------------|-------------------|
| Age [years]                                         | 68.37 (9.37)          | 74.54 (7.08)      |
| FEV <sub>1</sub> [liters]                           | 2.67 (0.61)           | 2.53 (0.58)       |
| FVC [liters]                                        | 3.56 (0.70)           | 3.39 (0.68)       |
| FEV <sub>1</sub> /FVC [%]                           | 74.71 (7.48)          | 74.62 (7.59)      |
| MMEF [25%-75%, liters/min]                          | 256.28 (110.70)       | 234.20 (103.38)   |
| Neutrophil-to-lymphocyte ratio (NLR)                | 2.27 (1.26)           | 2.82 (1.38)       |
| <b>Smoking status</b>                               |                       |                   |
| Current smoker                                      | 604 (8.1%)            | 42 (3.4%)         |
| Former smoker                                       | 4546 (60.9%)          | 797 (64.9%)       |
| Never smoker                                        | 2316 (31.0%)          | 389 (31.7%)       |
| <b>Body mass index (BMI) <sup>b</sup></b>           |                       |                   |
| Underweight or normal weight (<25.0)                | 1909 (25.6%)          | 281 (22.9%)       |
| Overweight (≥25 to <30)                             | 4015 (53.8%)          | 637 (51.8%)       |
| Obese (≥30.0)                                       | 1541 (20.6%)          | 310 (25.2%)       |
| <b>Alcohol consumption (2+ drinks per day)</b>      | 1563 (21.0%)          | 226 (18.4%)       |
| <b>Years of education <sup>c</sup></b>              |                       |                   |
| ≤ 12 years                                          | 5534 (74.1%)          | 577 (47.0%)       |
| 13 – 16 years                                       | 773 (10.4%)           | 248 (20.2%)       |
| > 16 years                                          | 1156 (15.5%)          | 403 (32.8%)       |
| <b>Major diseases</b>                               |                       |                   |
| Hypertension                                        | 4539 (60.8%)          | 908 (73.9%)       |
| Stroke                                              | 366 (4.9%)            | 96 (7.8%)         |
| Coronary heart disease (CHD)                        | 1887 (25.3%)          | 398 (32.4%)       |
| Diabetes                                            | 743 (10.0%)           | 180 (14.7%)       |
| <b>Chronic obstructive pulmonary disease (COPD)</b> | 765 (10.3%)           | 132 (10.8%)       |
| <b>Other chronic lung conditions <sup>d</sup></b>   | 897 (12.0%)           | 157 (12.8%)       |

a: Mean values (standard deviation) for continuous variables and n (%) for categorical variables

b: Data missing for 1 visit

c: Data missing for 3 visits

d: Including asthma, chronic bronchitis, and emphysema

**eTable 2.** Associations of Neutrophil to Lymphocyte Ratio With Lung Function and Odds of COPD Stratified by Smoking Status

| Lung function parameters          | Never smokers [N = 2316] <sup>b</sup>  |                     |         | Ever smokers [N = 5150] <sup>c</sup>     |                     |         |
|-----------------------------------|----------------------------------------|---------------------|---------|------------------------------------------|---------------------|---------|
|                                   | Coefficients (SE)                      |                     | P-value | Coefficients (SE)                        |                     | P-value |
| FEV <sub>1</sub> [liters]         | -0.017 (0.007)                         |                     | 0.0272  | -0.026 (0.006)                           |                     | <0.0001 |
| FVC [liters]                      | -0.018 (0.009)                         |                     | 0.0521  | -0.018 (0.006)                           |                     | 0.0031  |
| FEV <sub>1</sub> /FVC [%]         | -0.110 (0.109)                         |                     | 0.3163  | -0.397 (0.080)                           |                     | <0.0001 |
| MMEF [25%-75%, liters/min]        | -2.682 (1.218)                         |                     | 0.0424  | -5.005 (1.112)                           |                     | <0.0001 |
| COPD                              | Number of cases                        | Odds Ratio (95% CI) | P-value | Case number                              | Odds Ratio (95% CI) | P-value |
| NLR [continuous]                  | 83                                     | 1.14 (0.98 – 1.32)  | 0.0888  | 682                                      | 1.09 (1.03 – 1.16)  | 0.0058  |
| NLR category 1<br>[Cutoff = 3.0]  | Low [N = 1862, N <sub>case</sub> = 58] | Ref                 |         | Low [N = 4111, N <sub>case</sub> = 492]  | Ref                 |         |
|                                   | High [N = 454, N <sub>case</sub> = 25] | 1.39 (0.83 – 2.30)  | 0.2082  | High [N = 1039, N <sub>case</sub> = 190] | 1.60 (1.31 – 1.96)  | <0.0001 |
| NLR category 2<br>[Cutoff = 2.27] | Low [N = 1415, N <sub>case</sub> = 42] | Ref                 |         | Low [N = 3155, N <sub>case</sub> = 368]  | Ref                 |         |
|                                   | High [N = 901, N <sub>case</sub> = 41] | 1.12 (0.70 – 1.78)  | 0.6466  | High [N = 1995, N <sub>case</sub> = 314] | 1.35 (1.12 – 1.62)  | 0.0011  |

a: Mixed-effect linear model for lung function parameters and mixed-effect logistic model for COPD were used with random participant-specific intercepts to account for the correlation of repeated measures

b: Model adjusted for age (years), body mass index (BMI, underweight or normal weight/ overweight/ obese), height (m), alcohol consumption (abstainer/ low/ intermediate/ high), education (≤12 years, 13-16 years, >16 years), hypertension, stroke, coronary heart disease (CHD), diabetes, and chronic lung conditions

c: Model additionally adjusted for pack-years

SE = Standard error; CIs = Confidence interval

**eTable 3.** Associations of Neutrophil to Lymphocyte Ratio at First Visit and Change Rate Between First and Up to Fifth Visit, Including Change Rate of Lung Function in Subgroup With Available Data From 2 Visits

| Visits                                                    | Average follow-up time (Year) | Predictor                                 | Lung function parameters | Change between two visits (per unit) |         | Change rate between two visits (per unit/year) |         |
|-----------------------------------------------------------|-------------------------------|-------------------------------------------|--------------------------|--------------------------------------|---------|------------------------------------------------|---------|
|                                                           |                               |                                           |                          | Coefficients (SE)                    | P-value | Coefficients (SE)                              | P-value |
| 1 <sup>st</sup> and 2 <sup>nd</sup> visits<br>[N = 1,336] | 3.67                          | NLR at 1 <sup>st</sup> visit <sup>b</sup> | FEV <sub>1</sub>         | -0.019 (0.008)                       | 0.0105  | -0.004 (0.002)                                 | 0.0471  |
|                                                           |                               |                                           | FVC                      | -0.032 (0.009)                       | 0.0007  | -0.008 (0.003)                                 | 0.0022  |
|                                                           |                               |                                           | FEV <sub>1</sub> /FVC    | -0.060 (0.139)                       | 0.6667  | -0.038 (0.042)                                 | 0.3592  |
|                                                           |                               |                                           | MMEF                     | -0.583 (2.079)                       | 0.7793  | -0.186 (0.604)                                 | 0.7574  |
|                                                           |                               | NLR change <sup>c</sup>                   | FEV <sub>1</sub>         | -0.016 (0.006)                       | 0.0112  |                                                |         |
|                                                           |                               |                                           | FVC                      | -0.018 (0.008)                       | 0.0219  |                                                |         |
|                                                           |                               |                                           | FEV <sub>1</sub> /FVC    | -0.119 (0.115)                       | 0.3002  |                                                |         |
|                                                           |                               |                                           | MMEF                     | -1.282 (1.710)                       | 0.4535  |                                                |         |
|                                                           |                               | NLR change rate <sup>c</sup>              | FEV <sub>1</sub>         |                                      |         | -0.004 (0.006)                                 | 0.4604  |
|                                                           |                               |                                           | FVC                      |                                      |         | -0.0005 (0.007)                                | 0.9481  |
|                                                           |                               |                                           | FEV <sub>1</sub> /FVC    |                                      |         | -0.113 (0.114)                                 | 0.3225  |
|                                                           |                               |                                           | MMEF                     |                                      |         | -1.178 (1.647)                                 | 0.4746  |
| 1 <sup>st</sup> and 3 <sup>rd</sup> visits<br>[N = 1,163] | 6.82                          | NLR at 1 <sup>st</sup> visit <sup>b</sup> | FEV <sub>1</sub>         | -0.008 (0.010)                       | 0.4073  | -0.0004 (0.001)                                | 0.7924  |
|                                                           |                               |                                           | FVC                      | -0.023 (0.012)                       | 0.0502  | -0.003 (0.002)                                 | 0.1310  |
|                                                           |                               |                                           | FEV <sub>1</sub> /FVC    | -0.187 (0.176)                       | 0.2889  | -0.028 (0.026)                                 | 0.2922  |
|                                                           |                               |                                           | MMEF                     | -2.027 (2.564)                       | 0.4293  | -0.447 (0.381)                                 | 0.2400  |
|                                                           |                               | NLR change <sup>c</sup>                   | FEV <sub>1</sub>         | -0.028 (0.006)                       | <0.0001 |                                                |         |
|                                                           |                               |                                           | FVC                      | -0.035 (0.007)                       | <0.0001 |                                                |         |
|                                                           |                               |                                           | FEV <sub>1</sub> /FVC    | -0.044 (0.114)                       | 0.6997  |                                                |         |
|                                                           |                               |                                           | MMEF                     | -3.992 (1.658)                       | 0.0162  |                                                |         |
|                                                           |                               | NLR change rate <sup>c</sup>              | FEV <sub>1</sub>         |                                      |         | -0.013 (0.006)                                 | 0.0348  |
|                                                           |                               |                                           | FVC                      |                                      |         | -0.019 (0.007)                                 | 0.0079  |
|                                                           |                               |                                           | FEV <sub>1</sub> /FVC    |                                      |         | -0.056 (0.114)                                 | 0.6214  |
|                                                           |                               |                                           | MMEF                     |                                      |         | -1.103 (1.649)                                 | 0.5307  |

| Visits                                                  | Average follow-up time (Year) | Predictor                                 | Lung function parameters | Change between two visits (per unit) |         | Change rate between two visits (per unit/year) |         |
|---------------------------------------------------------|-------------------------------|-------------------------------------------|--------------------------|--------------------------------------|---------|------------------------------------------------|---------|
|                                                         |                               |                                           |                          | Coefficients (SE)                    | P-value | Coefficients (SE)                              | P-value |
| 1 <sup>st</sup> and 4 <sup>th</sup> visits<br>[N = 988] | 9.95                          | NLR at 1 <sup>st</sup> visit <sup>b</sup> | FEV <sub>1</sub>         | 0.003 (0.012)                        | 0.7932  | 0.001 (0.001)                                  | 0.3139  |
|                                                         |                               |                                           | FVC                      | -0.005 (0.014)                       | 0.7042  | -0.0005 (0.001)                                | 0.7346  |
|                                                         |                               |                                           | FEV <sub>1</sub> /FVC    | 0.184 (0.213)                        | 0.3891  | 0.019 (0.021)                                  | 0.3763  |
|                                                         |                               |                                           | MMEF                     | 1.021 (0.299)                        | 0.7327  | 0.222 (0.306)                                  | 0.4685  |
|                                                         |                               | NLR change <sup>c</sup>                   | FEV <sub>1</sub>         | -0.035 (0.008)                       | <0.0001 |                                                |         |
|                                                         |                               |                                           | FVC                      | -0.030 (0.010)                       | 0.0015  |                                                |         |
|                                                         |                               |                                           | FEV <sub>1</sub> /FVC    | -0.358 (0.143)                       | 0.0125  |                                                |         |
|                                                         |                               |                                           | MMEF                     | -4.966 (2.021)                       | 0.0142  |                                                |         |
|                                                         |                               | NLR change rate <sup>c</sup>              | FEV <sub>1</sub>         |                                      |         | -0.014 (0.008)                                 | 0.0892  |
|                                                         |                               |                                           | FVC                      |                                      |         | -0.005 (0.010)                                 | 0.5822  |
|                                                         |                               |                                           | FEV <sub>1</sub> /FVC    |                                      |         | -0.289 (0.149)                                 | 0.0519  |
|                                                         |                               |                                           | MMEF                     |                                      |         | -1.794 (2.141)                                 | 0.4023  |
| 1 <sup>st</sup> and 5 <sup>th</sup> visits<br>[N = 777] | 13.33                         | NLR at 1 <sup>st</sup> visit <sup>b</sup> | FEV <sub>1</sub>         | 0.002 (0.015)                        | 0.9160  | 0.0006 (0.001)                                 | 0.6098  |
|                                                         |                               |                                           | FVC                      | 0.009 (0.018)                        | 0.6145  | 0.001 (0.001)                                  | 0.2879  |
|                                                         |                               |                                           | FEV <sub>1</sub> /FVC    | -0.235 (0.261)                       | 0.3672  | -0.020 (0.020)                                 | 0.3232  |
|                                                         |                               |                                           | MMEF                     | 0.682 (3.829)                        | 0.8586  | 0.068 (0.288)                                  | 0.8150  |
|                                                         |                               | NLR change <sup>c</sup>                   | FEV <sub>1</sub>         | -0.008 (0.008)                       | 0.3241  |                                                |         |
|                                                         |                               |                                           | FVC                      | -0.005 (0.010)                       | 0.6212  |                                                |         |
|                                                         |                               |                                           | FEV <sub>1</sub> /FVC    | -0.026 (0.145)                       | 0.8570  |                                                |         |
|                                                         |                               |                                           | MMEF                     | -0.664 (2.140)                       | 0.7565  |                                                |         |
|                                                         |                               | NLR change rate <sup>c</sup>              | FEV <sub>1</sub>         |                                      |         | 0.0002 (0.008)                                 | 0.9826  |
|                                                         |                               |                                           | FVC                      |                                      |         | 0.004 (0.010)                                  | 0.6936  |
|                                                         |                               |                                           | FEV <sub>1</sub> /FVC    |                                      |         | 0.020 (0.145)                                  | 0.8933  |
|                                                         |                               |                                           | MMEF                     |                                      |         | 1.562 (2.129)                                  | 0.4632  |

a: Change = Measures of last visit – Measures of 1<sup>st</sup> visit; Change rate = Change / Duration between the two visits (year)

b: Models adjusted for the covariates collected at the 1<sup>st</sup> visit, including: age (years), body mass index (BMI, underweight or normal weight/ overweight/ obese), height, smoking status (current/ former/ never), pack-years, alcohol intake (<2 drinks per day or ≥2 drinks per day), education (≤12 years, 13-16 years, >16 years), hypertension, stroke, coronary heart disease, diabetes, chronic lung conditions, and the corresponding lung function parameters measured at the 1<sup>st</sup> visit

c: Models additionally adjusted for NLR measured at the 1<sup>st</sup> visit



**eTable 4.** Association of Neutrophil to Lymphocyte Ratio With cg05575921

| Sample                                             | Model                |             |
|----------------------------------------------------|----------------------|-------------|
|                                                    | Coefficients<br>(SE) | P-<br>value |
| All visits from the subset [N = 1228] <sup>a</sup> | -0.0048 (0.0021)     | 0.026       |
| Subgroup <sup>b</sup>                              |                      |             |
| Never smokers [N = 389]                            | -0.0066 (0.0030)     | 0.028       |
| Ever smokers [N = 839]                             | -0.0046 (0.0029)     | 0.119       |

a: Model adjusted for age (years), body mass index (BMI, underweight or normal weight/ overweight/ obese), height (m), smoking status (current/ former/ never smoker), pack-years, alcohol consumption (abstainer/ low/ intermediate/ high), education ( $\leq 12$  years, 13-16 years,  $>16$  years), hypertension, stroke, coronary heart disease (CHD), diabetes, chronic lung conditions, the leukocyte distribution estimated by Houseman's algorithm, and the random batch effect

b: Model adjusted for all aforementioned covariates except smoking status. Pack-years was only controlled for in the subgroup of ever smokers  
SE = Standard error

**eTable 5.** Associations of Neutrophil to Lymphocyte Ratio and cg05575921 With Lung Function and Odds of COPD in the Subgroup With DNA Methylation Data

**a) Individual model <sup>a</sup>**

| <b>Biomarkers</b>                    | <b>NLR [per one unit increase]</b> |                | <b>cg05575921 [per SD decrease]</b> |                |
|--------------------------------------|------------------------------------|----------------|-------------------------------------|----------------|
| <b>Lung function parameters</b>      | <b>Coefficients (SE)</b>           | <b>P-value</b> | <b>Coefficients (SE)</b>            | <b>P-value</b> |
| FEV <sub>1</sub> [liters]            | -0.032 (0.009)                     | 0.0005         | -0.108 (0.016)                      | <0.0001        |
| FVC [liters]                         | -0.028 (0.011)                     | 0.009          | -0.071 (0.019)                      | 0.0002         |
| FEV <sub>1</sub> /FVC [%]            | -0.320 (0.137)                     | 0.020          | -1.749 (0.241)                      | <0.0001        |
| MMEF [25%-75%, liters/min]           | -4.641 (1.899)                     | 0.015          | -22.717 (3.175)                     | <0.0001        |
|                                      |                                    |                |                                     |                |
| <b>COPD [N<sub>case</sub> = 132]</b> | <b>Odds Ratio (95% CI)</b>         | <b>P-value</b> | <b>Odds Ratio (95% CI)</b>          | <b>P-value</b> |
|                                      | 1.13 (1.00 – 1.29)                 | 0.049          | 1.74 (1.40 – 2.15)                  | <0.0001        |

**b) Mutually adjusted model <sup>b</sup>**

| <b>Biomarkers</b>                    | <b>NLR [per one unit increase]</b> |                | <b>cg05575921 [per SD decrease]</b> |                |
|--------------------------------------|------------------------------------|----------------|-------------------------------------|----------------|
| <b>Lung function parameters</b>      | <b>Coefficients (SE)</b>           | <b>P-value</b> | <b>Coefficients (SE)</b>            | <b>P-value</b> |
| FEV <sub>1</sub> [liters]            | -0.030 (0.009)                     | 0.001          | -0.104 (0.016)                      | <0.0001        |
| FVC [liters]                         | -0.026 (0.011)                     | 0.015          | -0.068 (0.019)                      | 0.0004         |
| FEV <sub>1</sub> /FVC [%]            | -0.300 (0.135)                     | 0.026          | -1.680 (0.240)                      | <0.0001        |
| MMEF [25%-75%, liters/min]           | -4.587 (1.781)                     | 0.010          | -21.744 (3.165)                     | <0.0001        |
|                                      |                                    |                |                                     |                |
| <b>COPD [N<sub>case</sub> = 132]</b> | <b>Odds Ratio (95% CI)</b>         | <b>P-value</b> | <b>Odds Ratio (95% CI)</b>          | <b>P-value</b> |
|                                      | 1.11 (0.98 – 1.25)                 | 0.098          | 1.67 (1.36 – 2.05)                  | <0.0001        |

a: Mixed-effect linear model for lung function parameters and mixed-effect logistic model for COPD were used with random participant-specific intercepts to account for the correlation of repeated measures. Models adjusted for age (years), body mass index (BMI, underweight or normal weight/ overweight/ obese), height, smoking status (current/ former/ never), pack-years, alcohol intake (<2 drinks per day or ≥2 drinks per day), education, hypertension, stroke, coronary heart disease, diabetes, and chronic lung conditions. For models with cg05575921, the leukocyte distribution estimated by Houseman’s algorithm, and the random batch effect were additionally adjusted

b: This model adjusted for both biomarkers and all the covariates mentioned above except the cell composition estimated by Houseman’s algorithm because the NLR is very highly associated with the leucocyte distribution

**eTable 6.** Joint Associations of Neutrophil to Lymphocyte Ratio and cg05575921 With Lung Function and Odds of COPD in the Subgroup With DNA Methylation Data<sup>a</sup>

| <b>Lung function</b>                |                            |                            |                |
|-------------------------------------|----------------------------|----------------------------|----------------|
| <b>Category [N]</b>                 | <b>Parameter</b>           | <b>Coefficients (SE)</b>   | <b>P-value</b> |
| NLR <3 & cg05575921 ≥0.85 [N = 402] | FEV <sub>1</sub> [liters]  | Ref                        |                |
| NLR ≥3 & cg05575921 ≥0.85 [N = 212] |                            | -0.065 (0.035)             | 0.064          |
| NLR <3 & cg05575921 <0.85 [N = 398] |                            | -0.095 (0.039)             | 0.015          |
| NLR ≥3 & cg05575921 <0.85 [N = 216] |                            | -0.198 (0.041)             | <0.0001        |
| NLR <3 & cg05575921 ≥0.85 [N = 402] | FVC [liters]               | Ref                        |                |
| NLR ≥3 & cg05575921 ≥0.85 [N = 212] |                            | -0.011 (0.041)             | 0.793          |
| NLR <3 & cg05575921 <0.85 [N = 398] |                            | -0.079 (0.045)             | 0.079          |
| NLR ≥3 & cg05575921 <0.85 [N = 216] |                            | -0.132 (0.048)             | 0.006          |
| NLR <3 & cg05575921 ≥0.85 [N = 402] | FEV <sub>1</sub> /FVC [%]  | Ref                        |                |
| NLR ≥3 & cg05575921 ≥0.85 [N = 212] |                            | -0.784 (0.580)             | 0.177          |
| NLR <3 & cg05575921 <0.85 [N = 398] |                            | -1.921 (0.521)             | 0.0002         |
| NLR ≥3 & cg05575921 <0.85 [N = 216] |                            | -3.169 (0.610)             | <0.0001        |
| NLR <3 & cg05575921 ≥0.85 [N = 402] | MMEF [25%-75%, liters/min] | Ref                        |                |
| NLR ≥3 & cg05575921 ≥0.85 [N = 212] |                            | -14.304 (7.520)            | 0.991          |
| NLR <3 & cg05575921 <0.85 [N = 398] |                            | -17.022 (6.856)            | 0.233          |
| NLR ≥3 & cg05575921 <0.85 [N = 216] |                            | -35.784 (7.925)            | 0.002          |
|                                     |                            |                            |                |
| <b>COPD</b>                         |                            |                            |                |
| <b>Category<sup>b</sup></b>         | <b>N<sub>case</sub></b>    | <b>Odds Ratio (95% CI)</b> | <b>P-value</b> |
| NLR <3 & cg05575921 ≥0.85 [N = 402] | 12                         | Ref                        |                |
| NLR ≥3 & cg05575921 ≥0.85 [N = 212] | 12                         | 2.13 (0.91 – 4.95)         | 0.080          |
| NLR <3 & cg05575921 <0.85 [N = 398] | 63                         | 3.17 (1.60 – 6.25)         | 0.0009         |
| NLR ≥3 & cg05575921 <0.85 [N = 216] | 45                         | 4.12 (2.02 – 8.37)         | <0.0001        |

a: Mixed-effect linear model for lung function parameters and mixed-effect logistic model for COPD were used with random participant-specific intercepts to account for the correlation of repeated measures. Models adjusted for age (years), body mass index (BMI, underweight or normal weight/ overweight/ obese), height, smoking status (current/ former/ never), pack-years, alcohol intake (< 2 drinks per day or ≥ 2 drinks per day), education, hypertension, stroke, coronary heart disease, diabetes, chronic lung conditions, and the random batch effect for DNA methylation measurement

**eTable 7.** Association of Neutrophil to Lymphocyte Ratio With COPD Incidence in the Subgroup With DNA Methylation Data

| <b>Indicator</b>                 | <b>Model <sup>a</sup></b> |                |
|----------------------------------|---------------------------|----------------|
|                                  | <b>HR (95% CI)</b>        | <b>P-value</b> |
| NLR [per one unit increase]      | 1.04 (0.98 – 1.09)        | 0.180          |
| cg05575921 [per one SD decrease] | 1.59 (0.91 – 2.80)        | 0.104          |

a: Model adjusted for age (years), body mass index (BMI, underweight or normal weight/ overweight/ obese), height (m), smoking status (current/ former/ never smoker), pack-years, alcohol consumption (abstainer/ low/ intermediate/ high), education ( $\leq 12$  years, 13-16 years,  $>16$  years), hypertension, stroke, coronary heart disease (CHD), diabetes, and chronic lung conditions. For models with cg05575921, the leukocyte distribution estimated by Houseman's algorithm and the random batch effect were additionally adjusted

HR = Hazard ratio; CI = Confidence interval; SD = Standard error

**eTable 8.** Estimates of Natural Direct and Natural Indirect Associations of NLR or cg05575921 on Lung Function and Proportion Mediated by cg05575921 or NLR

**a) Effects of NLR on lung function via cg05575921 methylation**

| Lung function parameters   | Total effect (SE) | Natural direct effect (SE) | Natural indirect effect (SE) | Proportion mediated |
|----------------------------|-------------------|----------------------------|------------------------------|---------------------|
| FEV <sub>1</sub> [liters]  | -0.0283 (0.0155)  | -0.0209 (0.0153)           | -0.0074 (0.0033)             | 26.2%               |
| FVC [liters]               | -0.0123 (0.0172)  | -0.0073 (0.0181)           | -0.0050 (0.0025)             | 40.7%               |
| FEV <sub>1</sub> /FVC [%]  | -0.4886 (0.2325)  | -0.3708 (0.2276)           | -0.1178 (0.0521)             | 24.1%               |
| MMEF [25%-75%, liters/min] | -5.7951 (3.0617)  | -4.3600 (3.0078)           | -1.4351 (0.6395)             | 24.8%               |

**b) Effects of cg05575921 methylation on lung function via NLR**

| Lung function parameters   | Total effect (SE) | Natural direct effect (SE) | Natural indirect effect (SE) | Proportion mediated |
|----------------------------|-------------------|----------------------------|------------------------------|---------------------|
| FEV <sub>1</sub> [liters]  | -0.1156 (0.0154)  | -0.1143 (0.0154)           | -0.0013 (0.0011)             | 1.1%                |
| FVC [liters]               | -0.0791 (0.0182)  | -0.0786 (0.0182)           | -0.0005 (0.0012)             | 0.7%                |
| FEV <sub>1</sub> /FVC [%]  | -1.7942 (0.2302)  | -1.7740 (0.2305)           | -0.0201 (0.0170)             | 1.1%                |
| MMEF [25%-75%, liters/min] | -22.6068 (3.0214) | -22.3235 (3.0248)          | -0.2833 (0.2282)             | 1.3%                |

a: Effects were shown by one-unit increase in NLR and one-SD decrease in cg05575921. Models adjusted for age (years), body mass index (BMI, underweight or normal weight/ overweight/ obese), height, smoking status (current/ former/ never), pack-years, alcohol intake (<2 drinks per day or ≥2 drinks per day), education, hypertension, stroke, coronary heart disease, diabetes, chronic lung condition, the leukocyte distribution estimated by Houseman's algorithm, and the batch number of DNA methylation measurements

**eTable 9.** Estimates of Natural Direct and Natural Indirect Associations of NLR or cg05575921 on Lung Function and Proportion Mediated by cg05575921 or NLR Stratified by Smoking Status<sup>a</sup>

**1) Never smoker [N = 389]**

**c) Effects of NLR on lung function via cg05575921 methylation**

| <b>Lung function parameters</b> | <b>Total effect (SE)</b> | <b>Natural direct effect (SE)</b> | <b>Natural indirect effect (SE)</b> | <b>Proportion mediated</b> |
|---------------------------------|--------------------------|-----------------------------------|-------------------------------------|----------------------------|
| FEV <sub>1</sub> [liters]       | -0.0629 (0.0251)         | -0.0583 (0.0252)                  | -0.0046 (0.0036)                    | 7.3%                       |
| FVC [liters]                    | -0.0715 (0.0315)         | -0.0706 (0.0318)                  | -0.0009 (0.0039)                    | 1.2%                       |
| FEV <sub>1</sub> /FVC [%]       | -0.1706 (0.0860)         | -0.1637 (0.4239)                  | -0.0069 (0.4261)                    | 4.0%                       |
| MMEF [25%-75%, liters/min]      | -3.2124 (3.3652)         | -3.1424 (3.3715)                  | -0.0700 (0.2202)                    | 2.2%                       |

**d) Effects of cg05575921 methylation on lung function via NLR**

| <b>Lung function parameters</b> | <b>Total effect (SE)</b> | <b>Natural direct effect (SE)</b> | <b>Natural indirect effect (SE)</b> | <b>Proportion mediated</b> |
|---------------------------------|--------------------------|-----------------------------------|-------------------------------------|----------------------------|
| FEV <sub>1</sub> [liters]       | -0.0543 (0.0357)         | -0.0558 (0.0354)                  | 0.0015 (0.0043)                     | -2.7%                      |
| FVC [liters]                    | -0.0135 (0.0448)         | -0.0153 (0.0446)                  | 0.0018 (0.0052)                     | -13.4%                     |
| FEV <sub>1</sub> /FVC [%]       | -1.8514 (0.5820)         | -1.8531 (0.5820)                  | 0.0017 (0.0113)                     | -0.1%                      |
| MMEF [25%-75%, liters/min]      | -9.4291 (7.9660)         | -9.6072 (7.9509)                  | 0.1782 (0.5288)                     | -1.9%                      |

2) Ever smoker [N = 839]

e) Effects of NLR on lung function via cg05575921 methylation

| Lung function parameters   | Total effect (SE) | Natural direct effect (SE) | Natural indirect effect (SE) | Proportion mediated |
|----------------------------|-------------------|----------------------------|------------------------------|---------------------|
| FEV <sub>1</sub> [liters]  | -0.0146 (0.0182)  | -0.0077 (0.0177)           | -0.0070 (0.0044)             | 47.6%               |
| FVC [liters]               | -0.0147 (0.0205)  | -0.0098 (0.0206)           | -0.0049 (0.0032)             | 33.3%               |
| FEV <sub>1</sub> /FVC [%]  | -0.7592 (0.2758)  | -0.6492 (0.2680)           | -0.1100 (0.0683)             | 14.5%               |
| MMEF [25%-75%, liters/min] | -5.3239 (3.6065)  | -3.8876 (3.5060)           | -1.4363 (0.8914)             | 26.9%               |

f) Effects of cg05575921 methylation on lung function via NLR

| Lung function parameters   | Total effect (SE) | Natural direct effect (SE) | Natural indirect effect (SE) | Proportion mediated |
|----------------------------|-------------------|----------------------------|------------------------------|---------------------|
| FEV <sub>1</sub> [liters]  | -0.1246 (0.0175)  | -0.1241 (0.0175)           | -0.0004 (0.0010)             | 0.3%                |
| FVC [liters]               | -0.0866 (0.0202)  | -0.0858 (0.0202)           | -0.0008 (0.0012)             | 0.9%                |
| FEV <sub>1</sub> /FVC [%]  | -1.8459 (0.2539)  | -1.8176 (0.2537)           | -0.0283 (0.0223)             | 1.5%                |
| MMEF [25%-75%, liters/min] | -24.9501 (3.2796) | -24.7589 (3.2826)          | -0.1913 (0.2163)             | 0.8%                |

a: The effects were shown by one-unit increase in NLR and one-SD decrease in cg05575921. Models adjusted for age (years), body mass index (BMI, underweight or normal weight/ overweight/ obese), height, alcohol intake (<2 drinks per day or ≥2 drinks per day), education, hypertension, stroke, coronary heart disease, diabetes, chronic lung condition, the leukocyte distribution estimated by Houseman's algorithm, and the batch number of DNA methylation measurements. Pack-years was additionally adjusted for in the model for ever smokers

**eFigure.** Associations of the Change Rate of Neutrophil to Lymphocyte Ratio Between the First and up to the Fifth Visit With Lung Function Change Rate

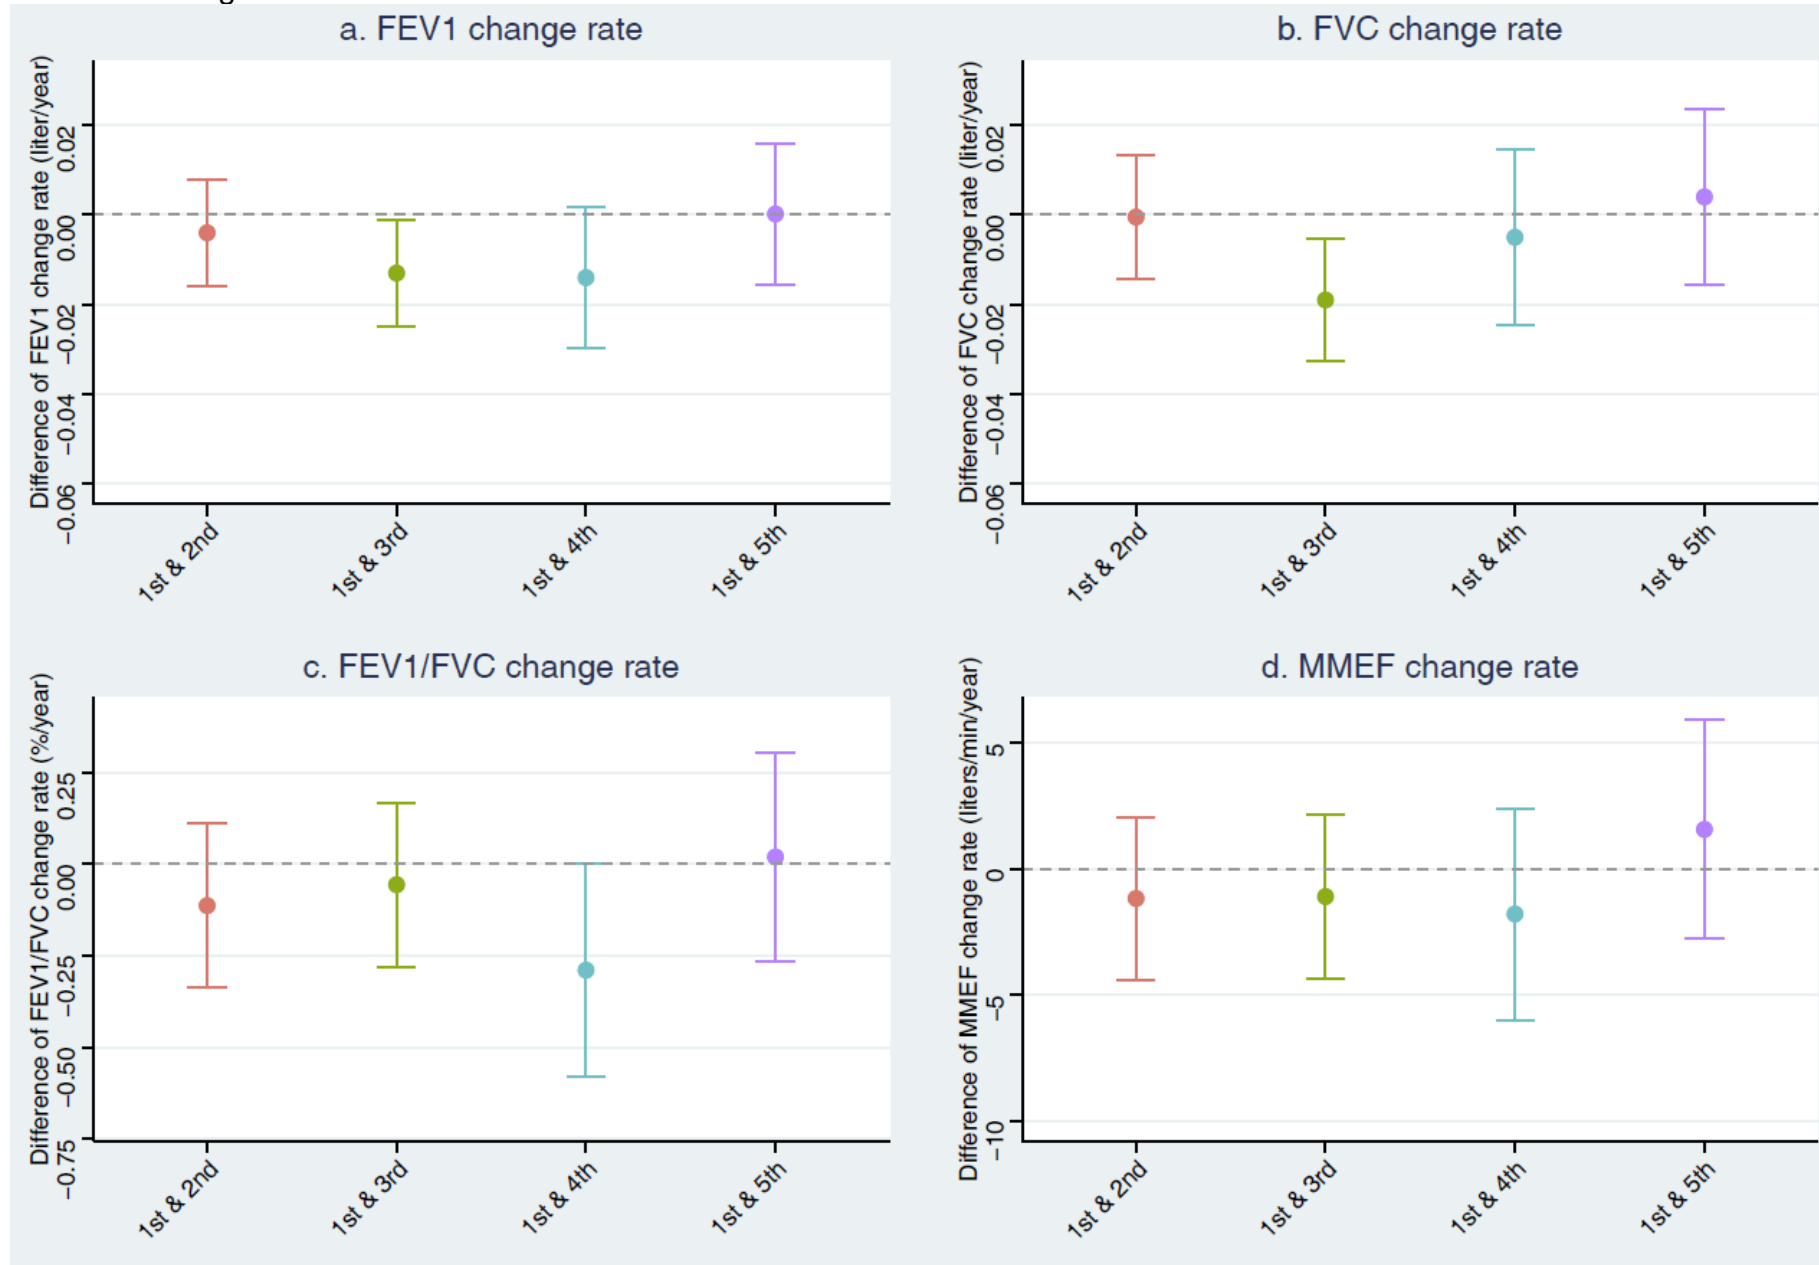

**Figure S1** Associations of the change rate of neutrophil-to-lymphocyte ratio between 1st and up to 5th visit with lung function change rate
